# Supplementary material
Source: Royal Society of Chemistry journal article supplement (doi:10.1039/d6ta00284f)
Supplement: d6ta00284f1.pdf [file d6ta00284f1.pdf]

## Supporting Information

### **Designing recyclable inorganic-organic hybrid polymer coatings through integrating silicone-based molecular scission points**

Christopher Fischer,<sup>\*a, b</sup> Anja Hart,<sup>a</sup> Ferdinand Somorowsky,<sup>a</sup> Claudia Stauch,<sup>a</sup> Diana Lau,<sup>a</sup>  
Gerhard Sextl<sup>a, b</sup> and Joseph C. Furgal<sup>\*c</sup>

<sup>a</sup>Fraunhofer Institute for Silicate Research, Neunerplatz 2, 97082 Würzburg, Germany

<sup>b</sup>University of Würzburg, Chair of Chemical Technology of Materials Synthesis, Röntgenring  
11, 97070 Würzburg, Germany

<sup>c</sup>Department of Chemistry and Center for Photochemical Sciences, Bowling Green State  
University, Bowling Green, Ohio 43403, United States

\*Joseph Coy Furgal - Department of Chemistry and Center for Photochemical Sciences,  
Bowling Green State University, Bowling Green, Ohio 43403, United States  
E-Mail: [furgalj@bgsu.edu](mailto:furgalj@bgsu.edu)

\*Christopher Fischer - Fraunhofer Institute for Silicate Research, Neunerplatz 2, 97082  
Würzburg, Germany  
E-Mail: [christopher.fischer@isc.fraunhofer.de](mailto:christopher.fischer@isc.fraunhofer.de)

## Supporting Information

This document contains eight pages, including one table and eight supplementary figures.

The supporting information contains contact angles against water as well as CH<sub>2</sub>I<sub>2</sub> and surface energy values for every coating system, images of colored coatings on different substrates, <sup>29</sup>Si-NMR spectra of the soluble fraction of the depolymerization mixture, a general reaction scheme of anionic ring opening polymerization (ROP), an overview of the reuse of non-silicone matrix shares, light scanning microscopy (LSM) analysis of a delaminated microscope glass slide, images of the delamination of different substrates, an image of the general coating delamination process, SEC data of a neat D<sub>4</sub> sample, the neat vinyl-capping agent and the repolymerized PDMS.

**Table S1:** Contact angles against diiodomethane and surface energy values for every coating system.

| Samples | $M_w$ [g/mol]               | Contact angles against diiodomethane [°] | Surface energy [mN/m] |
|---------|-----------------------------|------------------------------------------|-----------------------|
| S_4%    | 550 (short chains, S)       | 68 (± 2)                                 | 26 (± 1)              |
| S_8%    |                             | 69 (± 1)                                 | 25 (± 1)              |
| S_11%   |                             | 74 (± 1)                                 | 23 (± 1)              |
| S_14%   |                             | 72 (± 3)                                 | 23 (± 2)              |
| S_20%   |                             | 70 (± 1)                                 | 25 (± 1)              |
| L_4%    | 3400 g/mol (long chains, L) | 90                                       | 15                    |
| L_8%    |                             | 84 (± 2)                                 | 18 (± 1)              |
| L_11%   |                             | 87 (± 4)                                 | 17 (± 3)              |
| L_14%   |                             | 93 (± 6)                                 | 15 (± 4)              |

|       |  |                |                |
|-------|--|----------------|----------------|
| L_20% |  | 92 ( $\pm 3$ ) | 15 ( $\pm 2$ ) |
|-------|--|----------------|----------------|

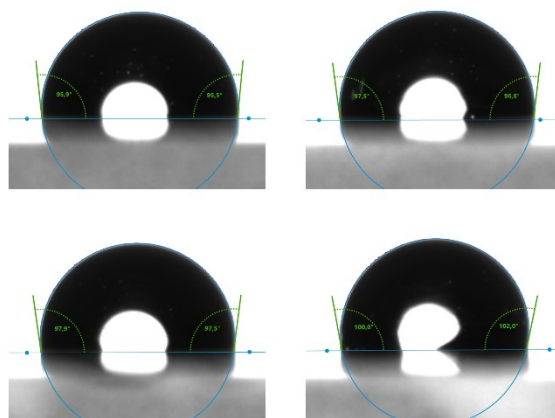

**Figure S1:** Water contact angle measurements for sample S\_4%.

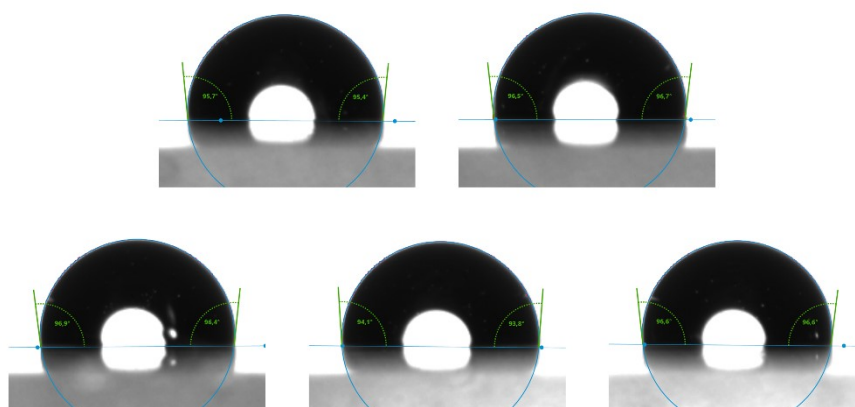

**Figure S2:** Water contact angle measurements for sample S\_8%.

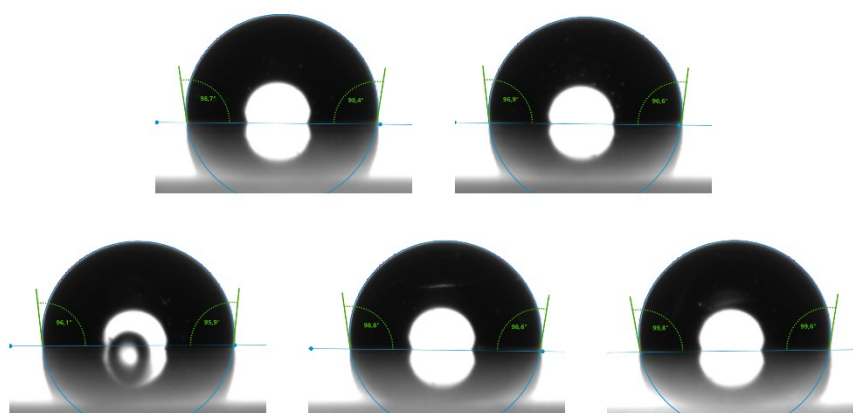

**Figure S3:** Water contact angle measurements for sample S\_11%.

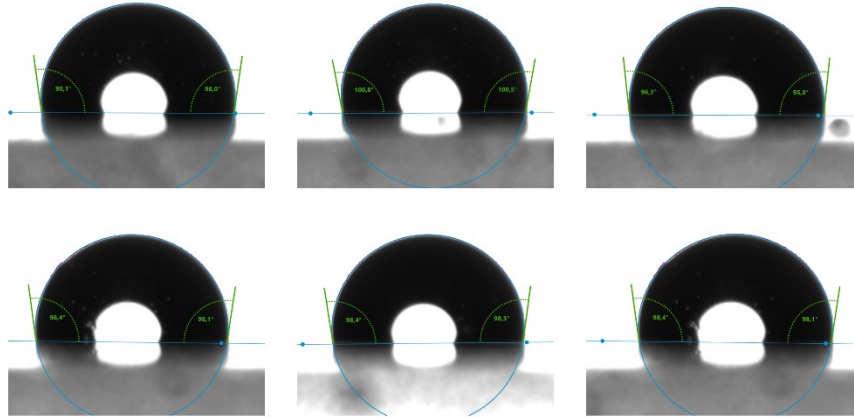

**Figure S4:** Water contact angle measurements for sample S\_14%.

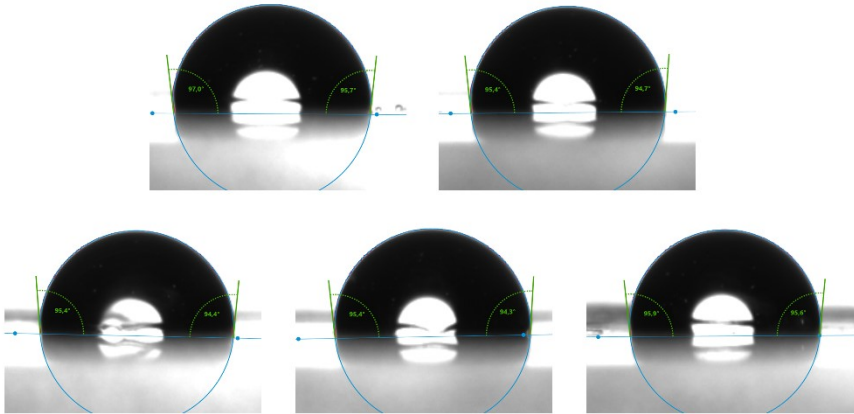

**Figure S5:** Water contact angle measurements for sample S\_20%.

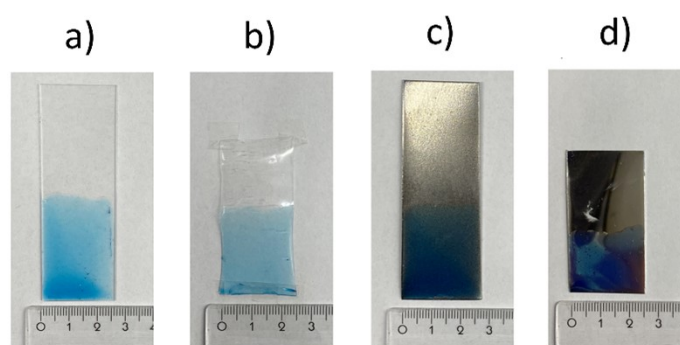

**Figure S6:** Coatings on a) glass, b) polyolefin, c) stainless steel and d) aluminum substrates. Transparent coatings were colored blue for display purposes using Ciba® ORASOL® Blue GN (Cu-phthalocyanine).

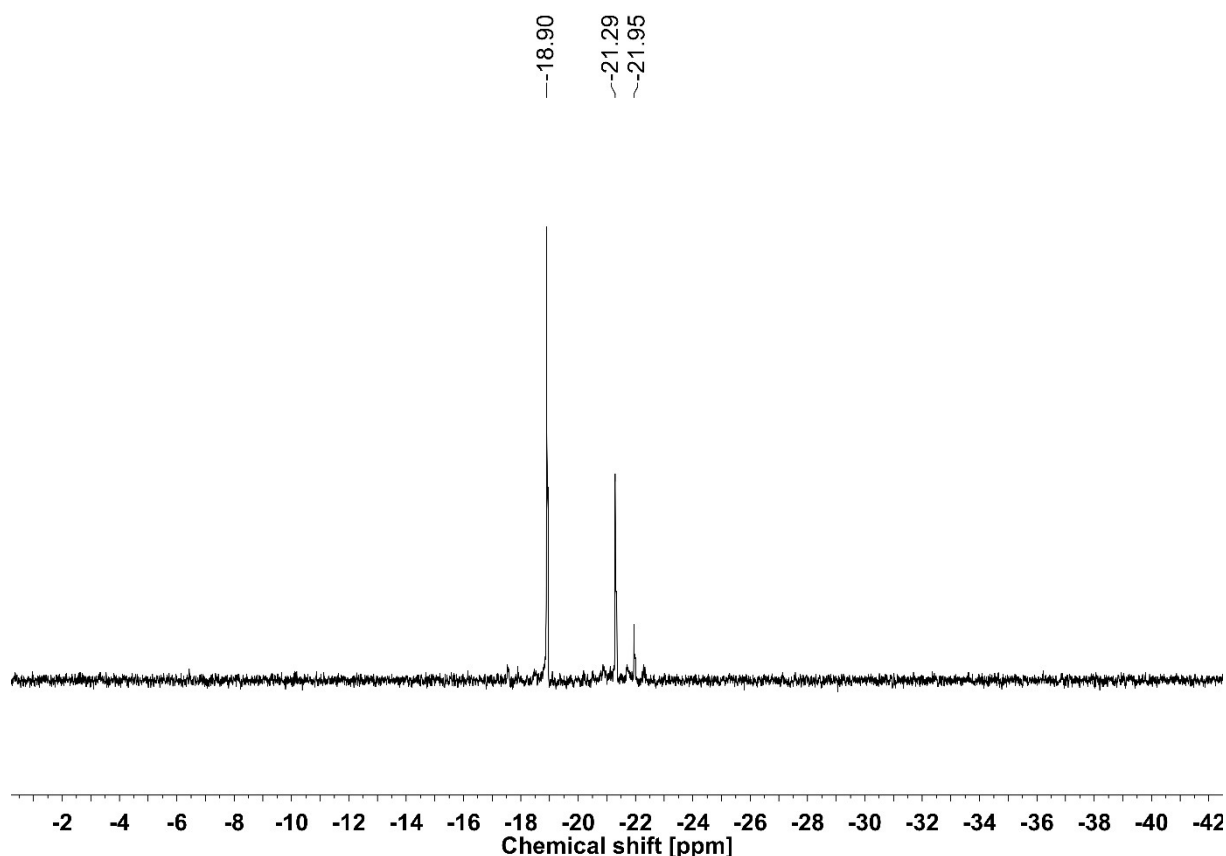

**Figure S7:**  $^{29}\text{Si}$ -NMR spectrum of the soluble fraction of the depolymerization mixture. Signals at - 18.90 ppm, - 21.29 ppm and - 21.95 ppm can be assigned to cyclic siloxanes  $\text{D}_4$ ,  $\text{D}_5$  and to linear polydimethylsiloxane (PDMS).<sup>1,2</sup> TMS was used as a reference.



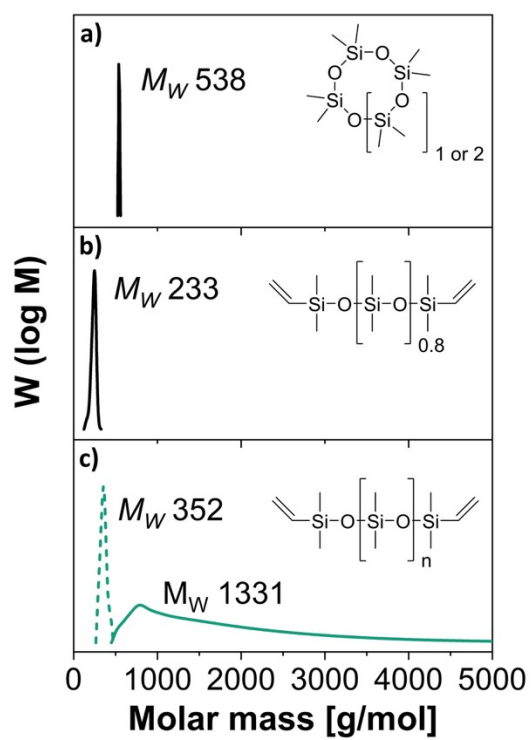

**Figure S10:** SEC of a D<sub>4</sub> reference (a), vinyl capping agent (b), and the reaction product of the ROP (c).

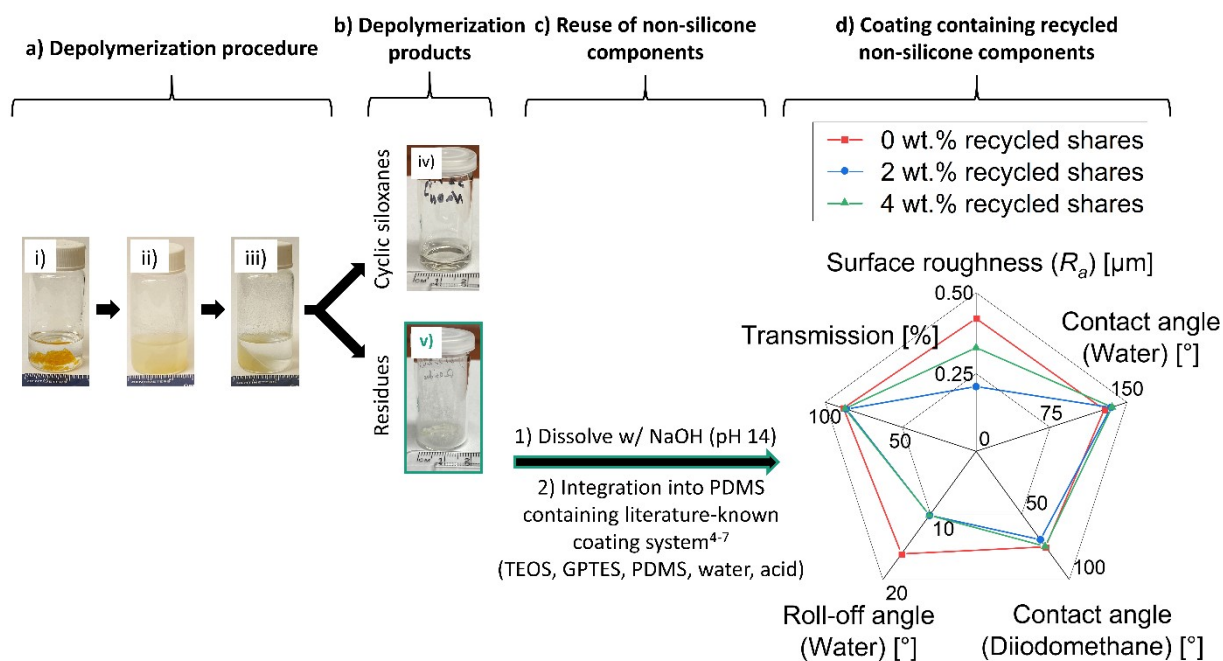

**Figure S11:** Reuse of inorganic-organic hybrid polymer coating's (IOHPC) non-silicone shares derived from the selective silicone depolymerization procedure: a) The depolymerization procedure (i: Polymer submersion in THF/TBAF, ii: Depolymerization at RT within 24 hours, iii: Separation of hybrid components (solid precipitate) by centrifugation) yields the depolymerization products, namely b) cyclic siloxanes (iv) and the non-silicone residues as a colorless powder (v). c) This powder is reused by dissolution in an alkaline solution of pH 14. The mixture is integrated into a PDMS-containing sol-gel coating, which is reported in literature<sup>4-7</sup>. d) The coating without recycled shares is characterized and compared with coatings containing 2 and 4 wt.% of recycled content (spider chart). Properties like transmission, surface roughness ( $R_a$ ), contact angles against water and diiodomethane remain in the same area. The water roll-off angle decreases for coatings containing recycled shares.

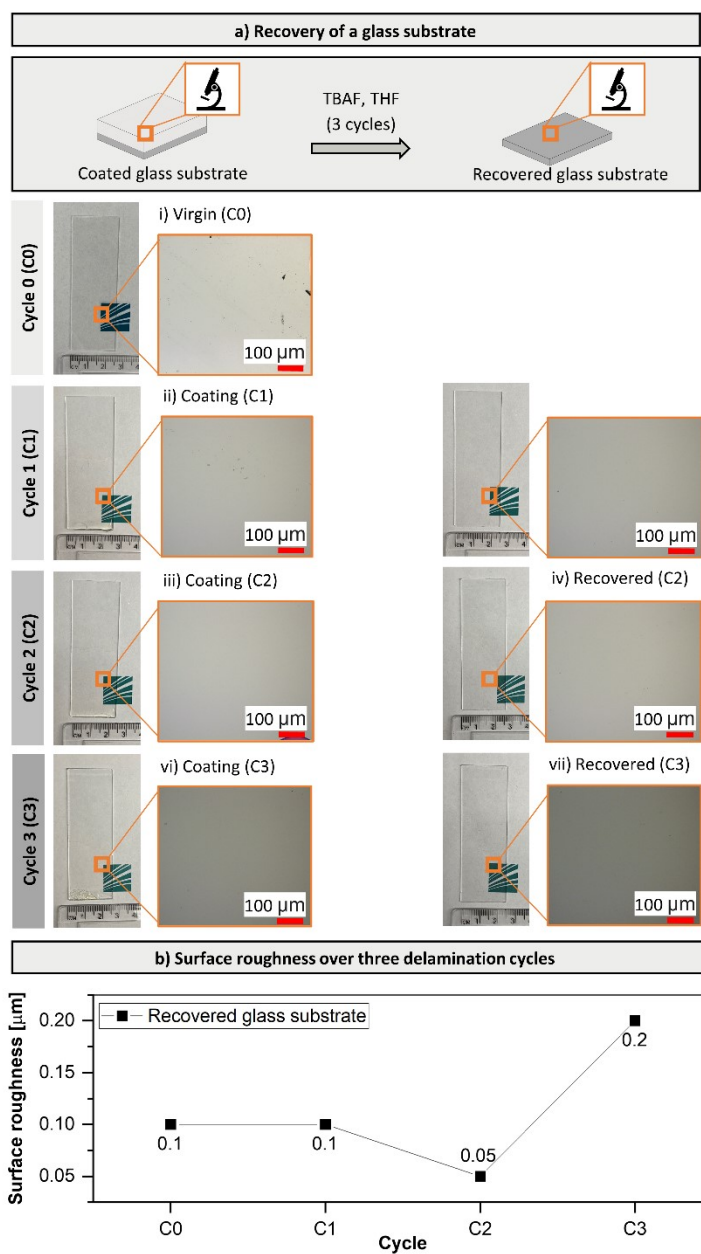

**Figure S12:** a) Recovering of a coated glass substrate by delamination with a depolymerization solution (tetrabutylammonium fluoride (TBAF) in tetrahydrofuran (THF)). Surface changes were evaluated *via* laser scanning microscopy (LSM). b) The evolution of the surface roughness values ( $R_a$ ) are displayed for the reference and the recovered substrate.

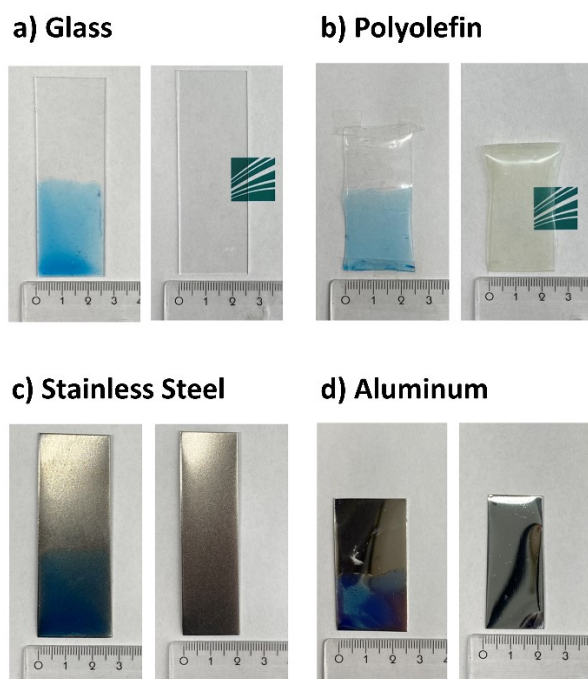

**Figure S13:** Photographs of delaminated a) glass, b) polyolefin, c) stainless steel and d) aluminum. Transparent coatings were colored blue for display purposes.

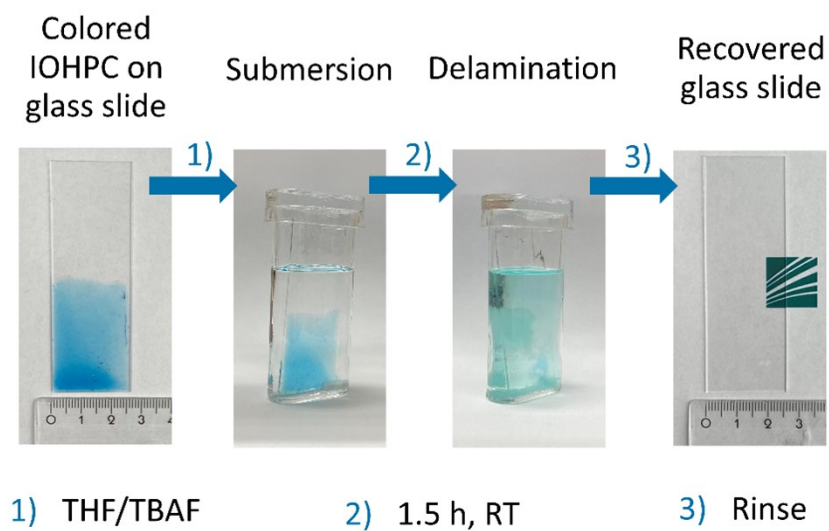

**Figure S14:** General delamination process of a colored IOHPC on a glass slide. 1) The coated glass slide is submerged in a THF/TBAF solution. 2) After approximately 1.5 hours of stirring at room temperature (RT) the delamination begins. 3) The glass slide is rinsed with THF and dried with a tissue.

## References

- 1 Y. Sato, R. Hayami and T. Gunji, *J Sol-Gel Sci Technol*, 2022, **104**, 36–52.
- 2 B. Rupasinghe and J. Furgal, *ACS Appl. Polym. Mater.*, 2021, **3**, 1828–1839.
- 3 T. Köhler, A. Gutacker and E. Mejía, *Org. Chem. Front.*, 2020, **7**, 4108–4120.
- 4 K.-H. Haas, S. Amberg-Schwab, K. Rose and G. Schottner, *Surf. Coat. Technol.*, 1999, **111**, 72–79.
- 5 K.-H. Haas and H. Wolter, *Curr. Opin. Solid State Mater. Sci.*, 1999, **4**, 571–580.
- 6 K.-H. Haas and K. Rose, *Adv. Mater.*, 2003, **5**, 47–52.
- 7 K. Emmert, S. Amberg-Schwab, F. Braca, A. Bazzichi, A. Cecchi and F. Somorowsky, *Polymers*, 2021, **13**.
